# Supplementary material
Source: MDPI journal article supplement (https://www.mdpi.com/2073-4344/13/2/413)
Supplement: s1 [file s1]

## Supplementary materials

# Reductive Catalytic Fractionation of Abies Wood into Bioliquids and Cellulose with Hydrogen in an Ethanol Medium over NiCuMo/SiO<sub>2</sub> Catalyst

Boris N. Kuznetsov <sup>1,2,\*</sup>, Angelina V. Miroshnikova <sup>1,2</sup>, Aleksandr S. Kazachenko <sup>1,2</sup>, Sergey V. Baryshnikov <sup>1</sup>, Yuriy N. Malyar <sup>1,2</sup>, Vadim A. Yakovlev <sup>3</sup>, Andrey M. Skripnikov <sup>1,2</sup>, Olga Yu. Fetisova <sup>1</sup>, Yong Xu <sup>4</sup> and Oxana P. Taran <sup>1,2</sup>

<sup>1</sup> Institute of Chemistry and Chemical Technology Federal Research Center "Krasnoyarsk Science Center SB RAS", Akademgorodok 50/24, Krasnoyarsk 660041, Russia

<sup>2</sup> Department of Organic and Analytical Chemistry, Institute of Non-Ferrous Metals and Material Science, Siberian Federal University, pr. Svobodny 79, Krasnoyarsk 660041, Russia

<sup>3</sup> Federal Research Center "Boreskov Institute of Catalysis", Pr. Akademika Lavrentieva 5, Novosibirsk 630090, Russia

<sup>4</sup> College of Chemical Engineering, Nanjing Forestry University, No. 159 Longpan Road, Nanjing, 210037, China

\* Correspondence: bnk@icct.ru

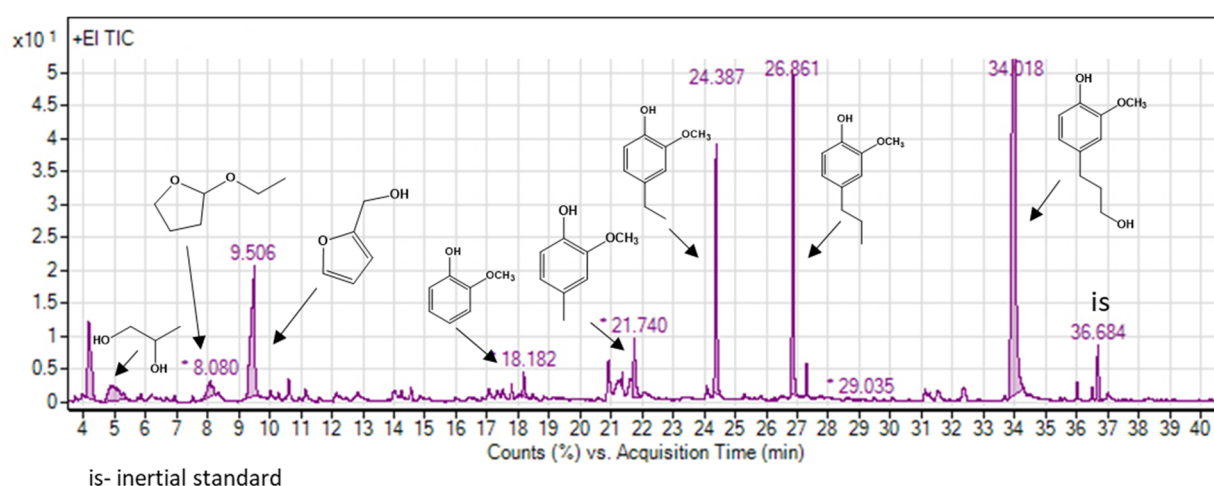

**Figure S1.** Chromatogram of liquid products of hydrogenation of the abies wood in the presence of NiCuMo/SiO<sub>2</sub> catalyst at 250 °C, 9 MPa, 3 h.
